# Supplementary material
Source: publisher figshare collection journal article supplement (https://acs.figshare.com/ndownloader/files/4622020)

**Supporting information for:**

**A series of *bis*(phosphinic)diamido yttrium complexes as initiators for lactide polymerization.**

Rachel H. Platel,<sup>a</sup> Andrew J.P. White,<sup>a</sup> Charlotte K. Williams<sup>a\*</sup>

a) Department of Chemistry, Imperial College London, London, SW7 2AZ, UK.

[c.k.williams@imperial.ac.uk](mailto:c.k.williams@imperial.ac.uk)

Pages 2-8: X-ray crystallography.

Page 9: Fig. S7

Page 10: Fig. S8

### *X-ray crystallography*

With the exception of the disordered Si(31) unit in the structure of **13** (see below), all of the Si-H protons in the structures of compounds **13**, **14** and **16** were located from  $\Delta F$  maps and refined subject to an Si-H distance constraint of 1.45 Å. The Si-H protons for both of the two identified orientations of the disordered Si(31) unit in **13** were placed in idealised positions and allowed to ride on their parent silicon atoms with an Si-H distance of 1.45 Å.

In the structure of **13**, disorder was found in the C(13) and C(19) isopropyl groups. In each case two orientations were identified, of *ca.* 57:43 and 71:29% partial occupancy respectively, with only the non-hydrogen atoms of the major occupancy orientations being refined anisotropically. In the same structure, disorder was also found in Si(31) SiMe<sub>2</sub>H unit. In this case three partial orientations were identified of *ca.* 64, 19 and 17% occupancy, with only the non-hydrogen atoms of the major occupancy orientation being refined anisotropically. The included toluene solvent molecule in the structure of **13** was found to be disordered about a  $\bar{4}$  position. One 25% occupancy orientation was identified (which was refined isotropically) and this generates three other overlapping orientations by operation of the  $\bar{4}$  symmetry.

In the structure of **16**, disorder was found in the N(3)/N(6) cyclohexyl ring. Two orientations of *ca.* 52 and 48 % occupancy were identified for the C<sub>6</sub> ring (see Fig. S4), and only the non-hydrogen atoms for the major occupancy orientation were refined anisotropically.

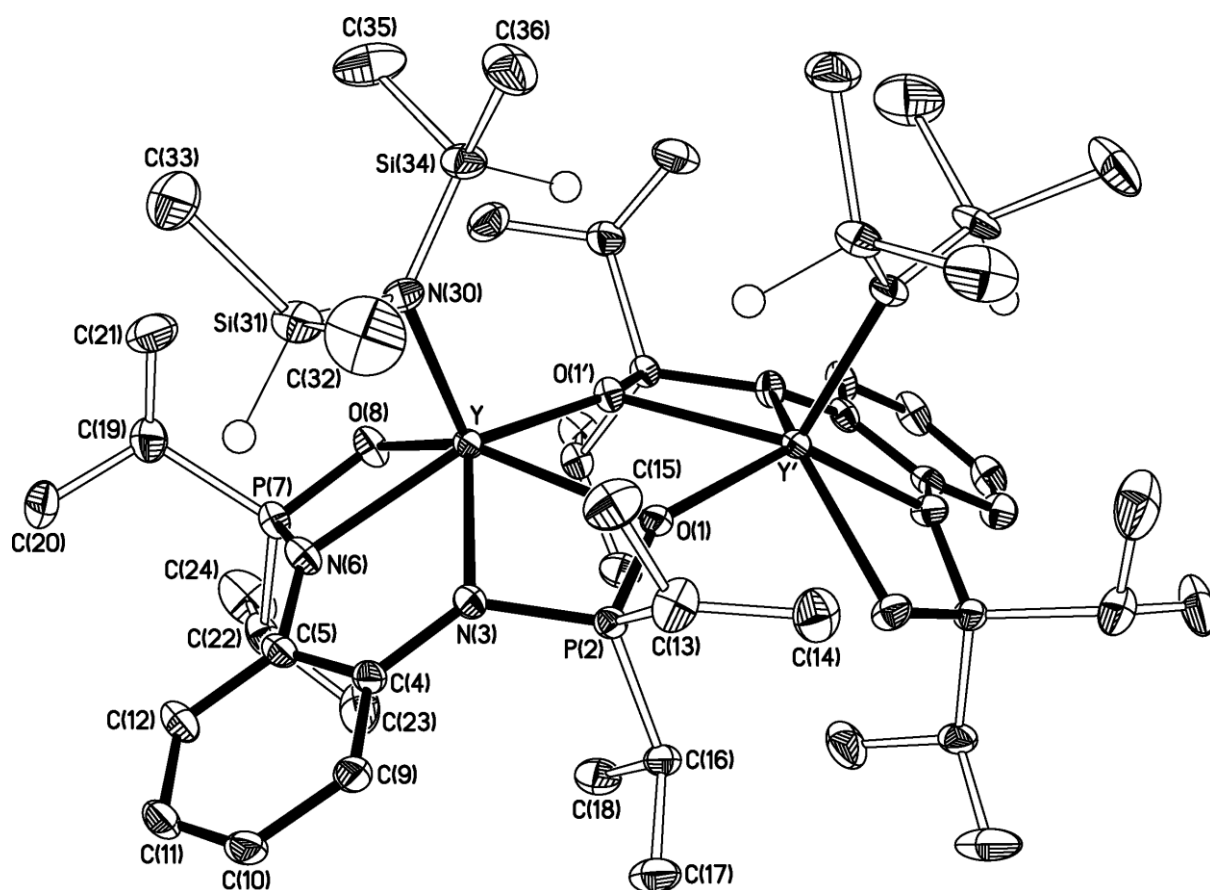

**Fig. S1** The molecular structure of the  $C_2$  symmetric complex **13** (30% probability ellipsoids).

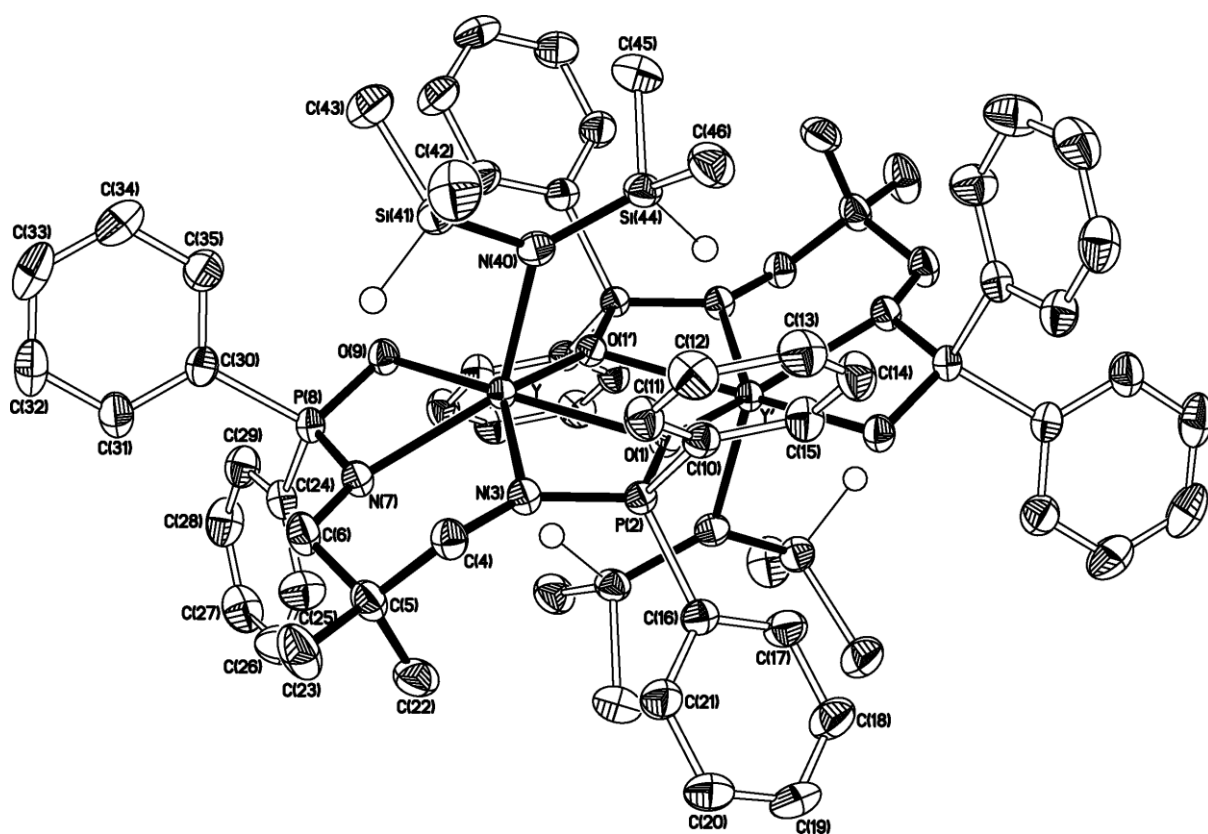

**Fig. S2** The molecular structure of the  $C_i$  symmetric complex **14** (50% probability ellipsoids).

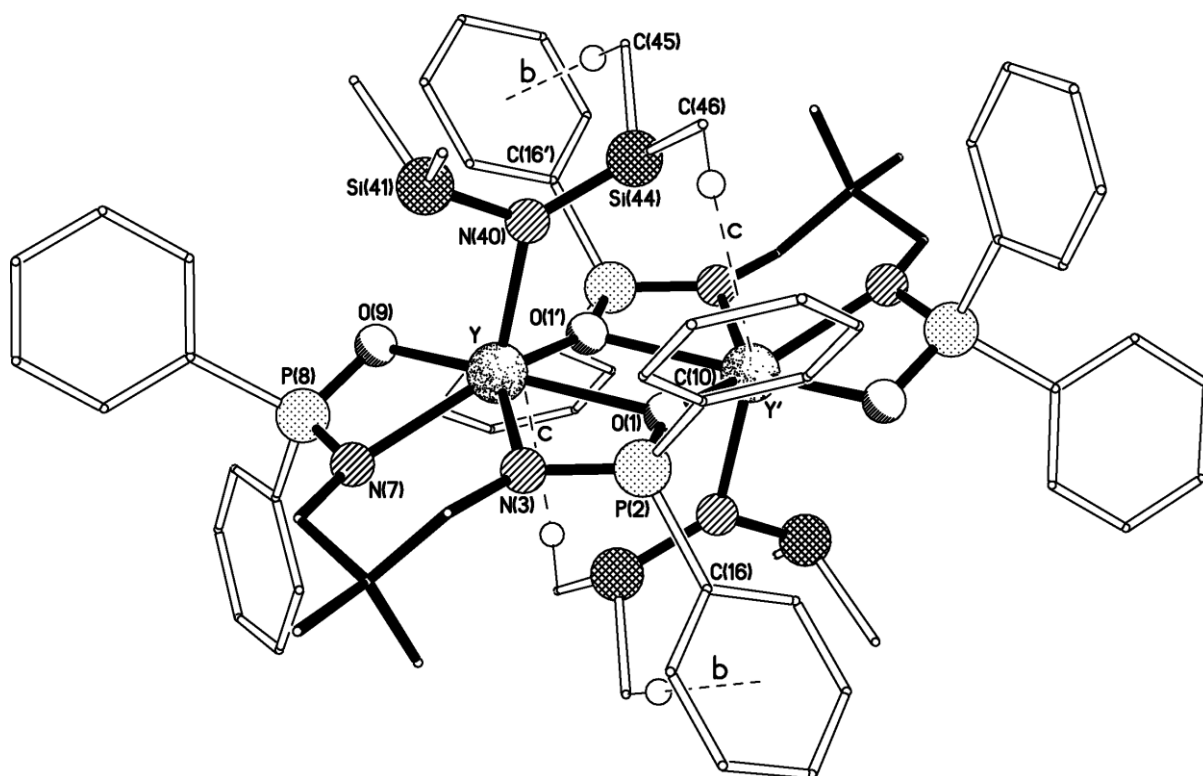

**Fig. S3** The molecular structure of the  $C_i$  symmetric complex **14** showing the pairs of C–H $\cdots\pi$  contacts from the  $N(\text{SiMe}_2\text{H})_2$  units “above” and “below” the  $\text{Y}_2\text{O}_2$  ring plane. The geometries of the C–H $\cdots\pi$  contacts [ $\text{H}\cdots\pi$ ] ( $\text{\AA}$ ), [ $\text{C–H}\cdots\pi$ ] ( $^\circ$ ) are (**b**) 2.80, 179; (**c**) 2.69, 175 (C–H distances fixed at 0.96  $\text{\AA}$ ).

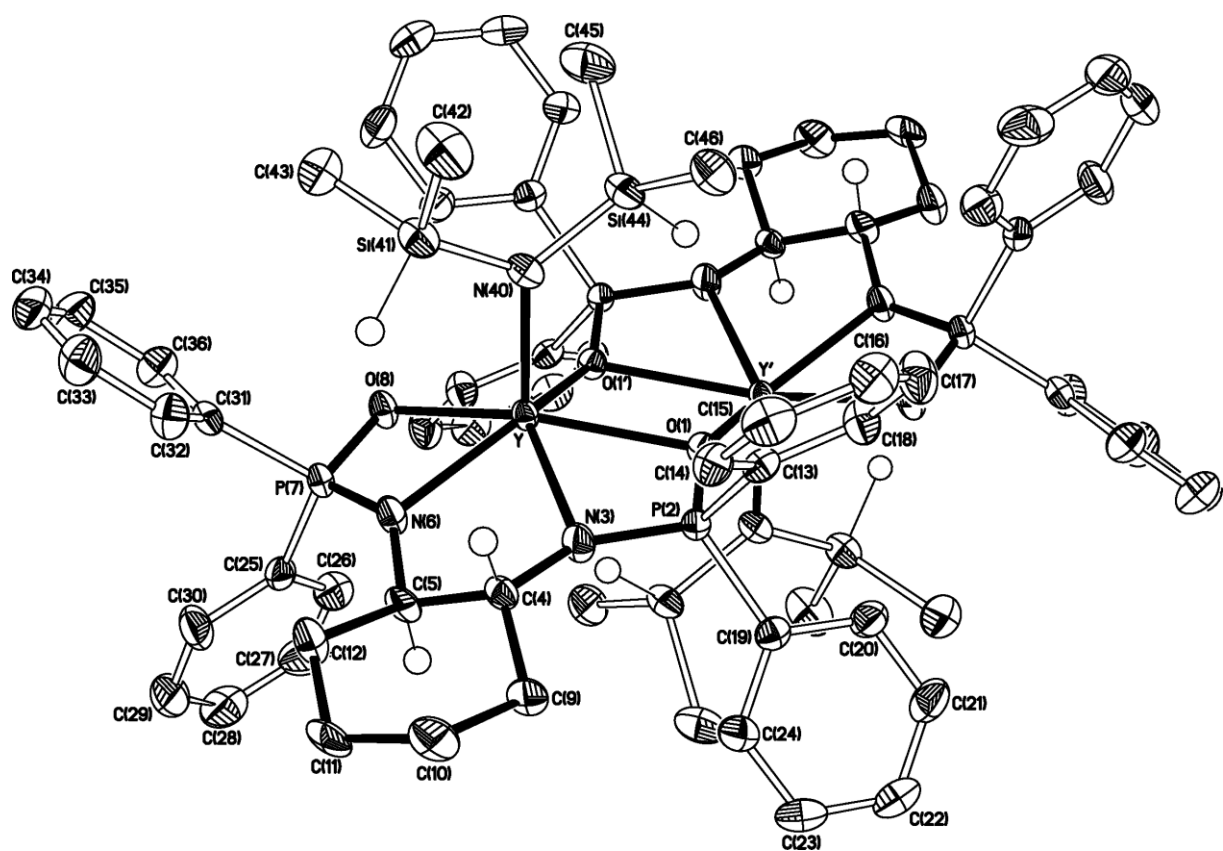

**Fig. S4** The molecular structure of the  $C_i$  symmetric complex **16** (50% probability ellipsoids).

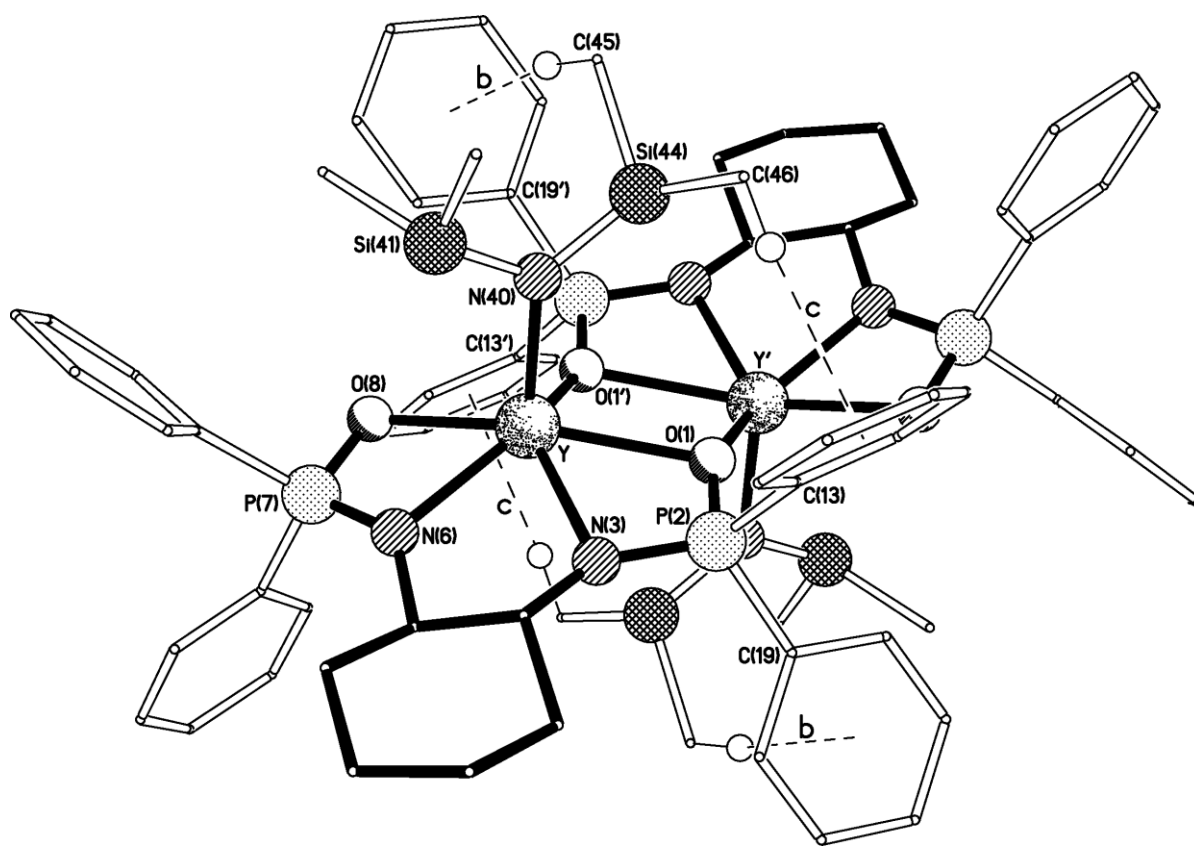

**Fig. S5** The molecular structure of the  $C_i$  symmetric complex **16** showing the pairs of C–H $\cdots\pi$  contacts from the  $N(\text{SiMe}_2\text{H})_2$  units “above” and “below” the  $\text{Y}_2\text{O}_2$  ring plane. The geometries of the C–H $\cdots\pi$  contacts [ $\text{H}\cdots\pi$ ] ( $\text{\AA}$ ), [ $\text{C–H}\cdots\pi$ ] ( $^\circ$ ) are (b) 2.75, 165; (c) 2.75, 171 (C–H distances fixed at 0.96  $\text{\AA}$ ).

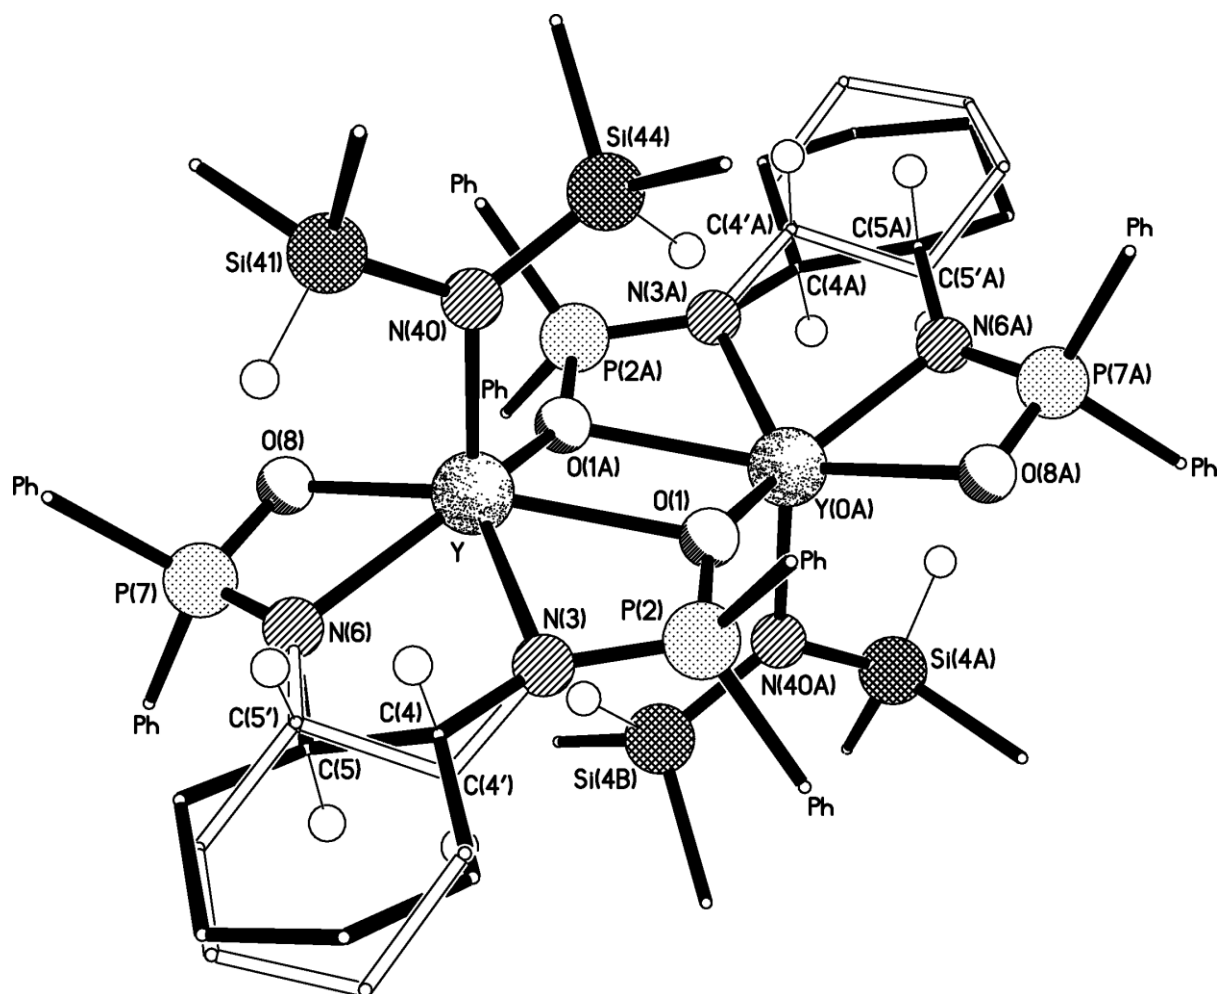

**Fig. S6** The disorder in the N(3)/N(6) cyclohexyl ring in the structure of the  $C_i$  symmetric complex **16** showing the two partial occupancy orientations. The major occupancy orientation (*ca.* 52%) has been drawn with dark bonds, and the minor occupancy orientation (*ca.* 48%) with open bonds.



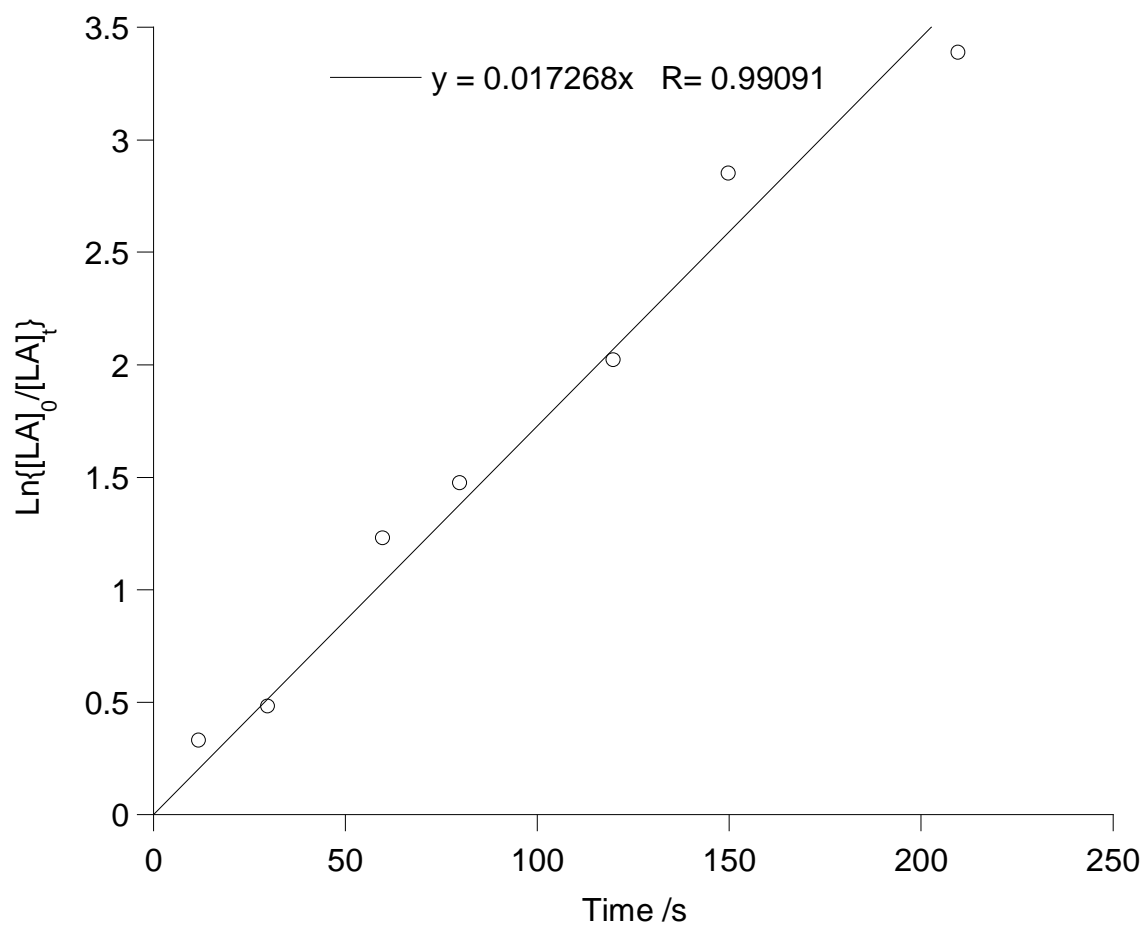

**Fig. S7:** Semilogarithmic plot of conversion vs. time using initiator **13** with 2 eq added  $i\text{PrOH}$ ..

Reaction conditions:  $[\text{LA}]_0 = 0.5 \text{ M}$  in  $\text{CH}_2\text{Cl}_2$ ;  $[\text{LA}]:[i\text{PrOH}]:[\mathbf{13}] = 400:2:1$ .

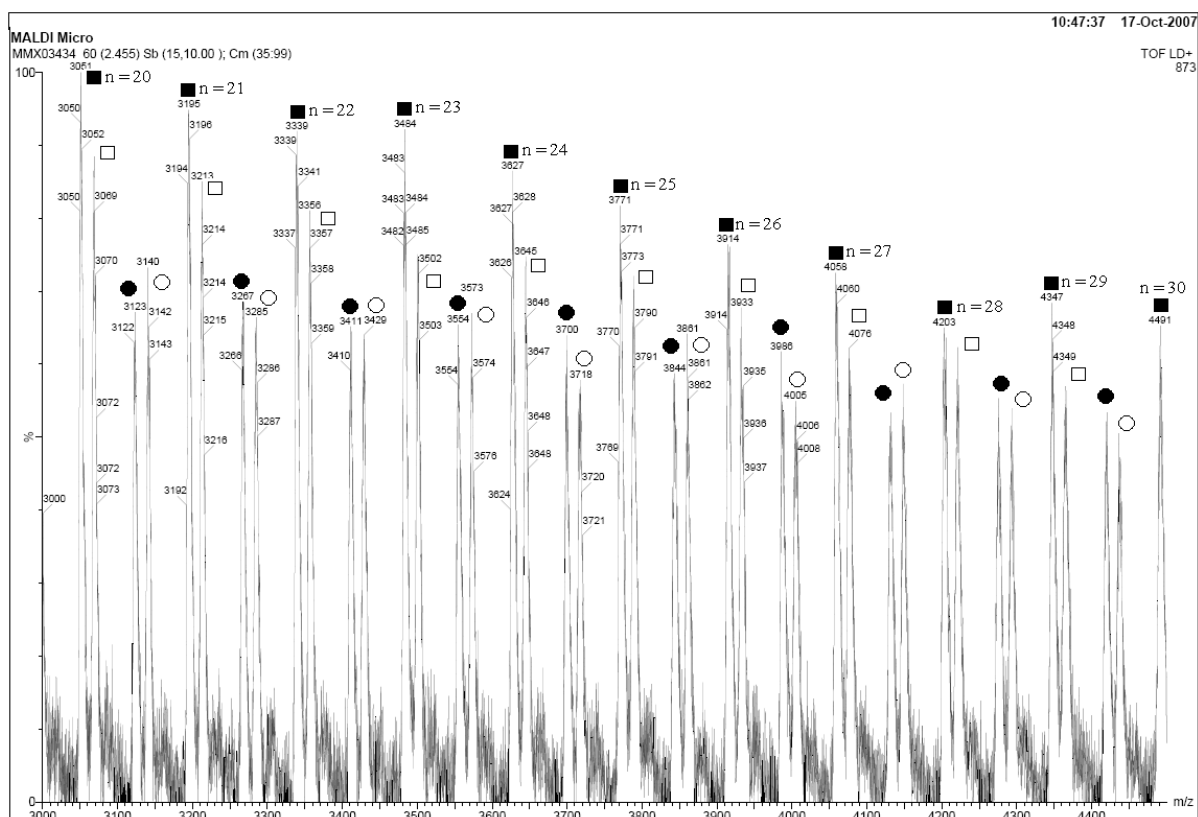

**Fig. S8:** Selected area of a MALDI-TOF mass spectrum of PLA using complex **16** as an initiator. Reaction conditions:  $[LA]_0 = 1.0 \text{ M}$  in  $\text{CH}_2\text{Cl}_2$ ;  $[LA]_0/[N(\text{SiHMe}_2)_2] = 200$ . Percentage conversion = 15 %. Key:

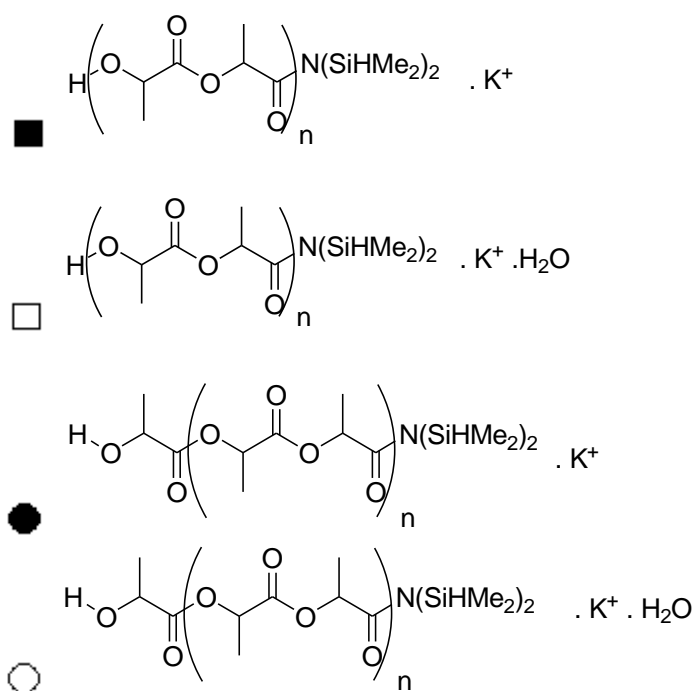

Supplement: Supplementary file 1 [file 4622020]
